# Supplementary material for: Inter/Intramolecular Bonds in TH<sub>5</sub><sup>+</sup> (T = C/Si/Ge): The Uniqueness of Carbon Bonds in Tetrel Bonds
Source: Preprints.org preprint supplement (doi:10.20944/preprints201809.0228.v1), 2018-09-13
Supplement: Supplementary file 1 [file supplementary]

# **Inter/intramolecular Bonds in $\text{TH}_5^+$ (T = C/Si/Ge): The Uniqueness of Carbon bonds in Tetrel Bonds**

Sharon Priya Gnanasekar and Elangannan Arunan\*  
Department of Inorganic and Physical Chemistry  
Indian Institute of Science, Bangalore. 560012 INDIA

\* Email: [arunan@iisc.ac.in](mailto:arunan@iisc.ac.in)

**Supporting Information**

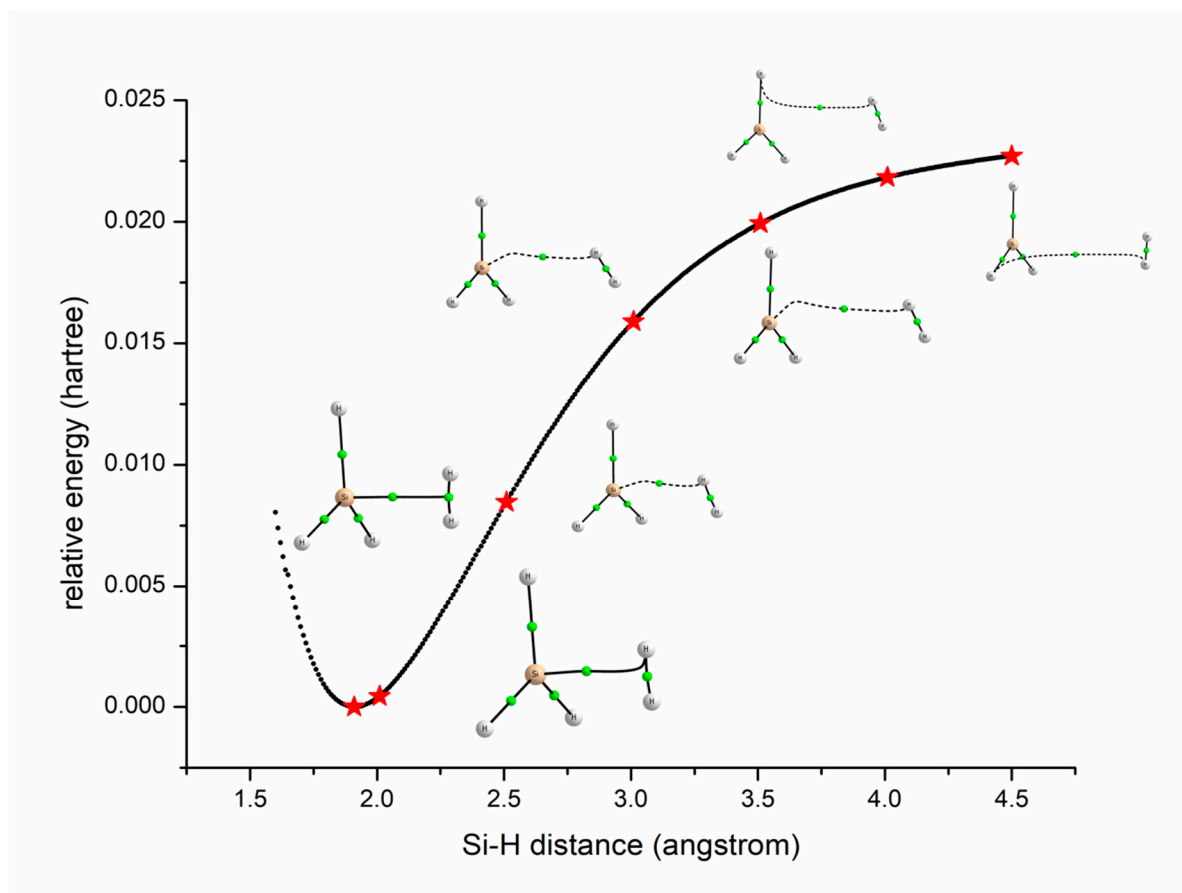

**Figure S1.** Potential energy scan obtained by varying the distance between the  $\text{SiH}_3^+$  and  $\text{H}_2$  moieties. Calculation done at MP2/aug-cc-pVDZ

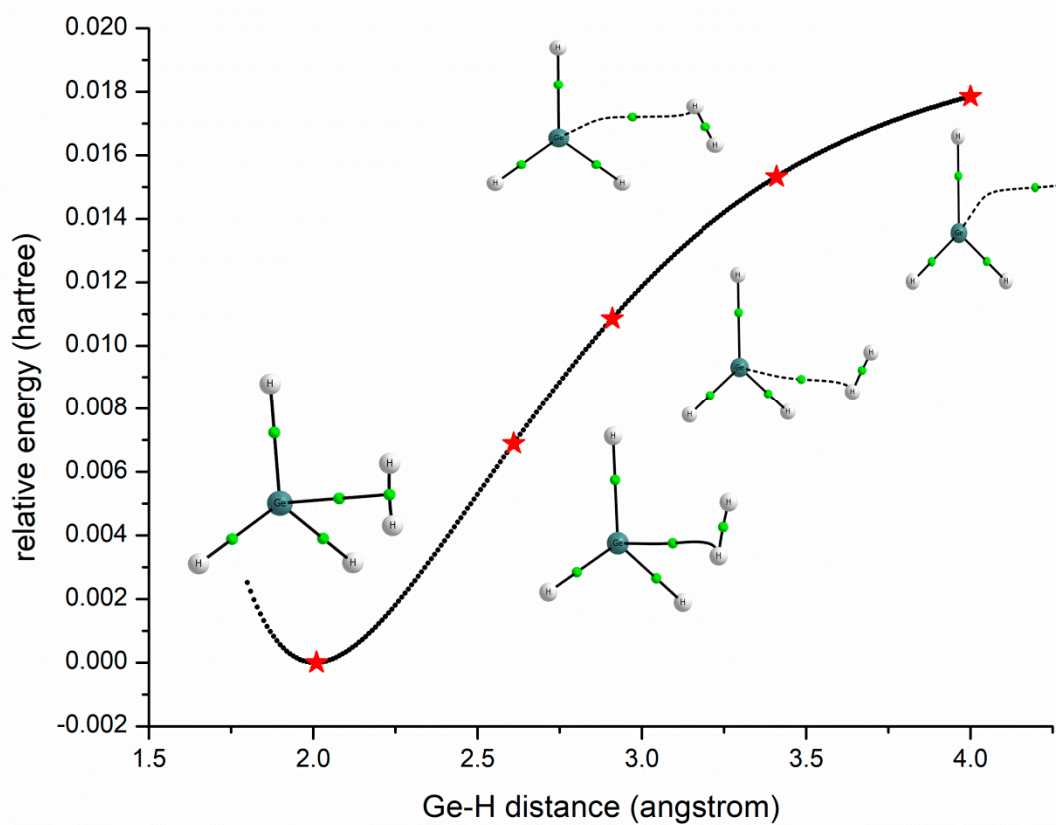

**Figure S2.** Potential energy scan obtained by varying the distance between the GeH<sub>3</sub><sup>+</sup> and H<sub>2</sub> moieties. Calculation done at MP2/aug-cc-pVDZ
